# Supplementary material for: Resources and tools for rare disease variant interpretation
Source: Front Mol Biosci. 2023 May 10;10:1169109. doi: 10.3389/fmolb.2023.1169109 (PMC10206239; doi:10.3389/fmolb.2023.1169109)
Supplement: Supplementary file 6 [file Table5.xlsx]

## Sheet: Table S5
Patogenicity predictions
Name	URL	PMID	bio.tools	Citations	Download	Web Server	Update	Mature	Stars
CADD	https://cadd.gs.washington.edu/score	30371827	https://bio.tools/cadd_phred						★★★★★
E-SNPs&GO	https://esnpsandgo.biocomp.unibo.it/	36227117	https://bio.tools/E-SNPsGO						★★★☆☆
FATHMM	http://fathmm.biocompute.org.uk/	25583119	NA					NA	★★★★☆
Human Splicing Finder	http://www.umd.be/HSF3/	19339519	https://bio.tools/human_splicing_finder						★★★★☆
MutPred2	http://mutpred.mutdb.org/	33219223	https://bio.tools/mutpred						★★★★☆
ORVAL	http://orval.ibsquare.be	31147699	https://bio.tools/Oligogenic_resource_for_variant_analysis						★★☆☆☆
PhD-SNPg	http://snps.biofold.org/phd-snpg	28482034	https://bio.tools/phd-snpg						★★★★☆
PON-All	http://structure.bmc.lu.se/PON-All	35782867	https://bio.tools/ProTstab						★★☆☆☆
SvAnna	https://github.com/TheJacksonLaboratory/SvAnna	34289339	https://bio.tools/svanna						★★☆☆☆
VEST4	https://karchinlab.org/apps/appVest.html	23819870	NA					NA	★★★☆☆
wInterVar	http://wintervar.wglab.org	28132688	https://bio.tools/intervar						★★★★★
WS-SNPs&GO	https://snps.biofold.org/snps-and-go	28102005	https://bio.tools/ws_snps_and_go						★★★★☆
Protein stability change
Name	URL	PMID	bio.tools	Citations	Download	Web Server	Update	Mature	Stars
DDGun	https://folding.biofold.org/ddgun/	35524565	https://bio.tools/ddgun						★★★★☆
FoldX	http://foldxsuite.crg.eu/	30874800	https://bio.tools/foldx						★★☆☆☆
INPS	http://inps.biocomp.unibo.it	25957347	https://bio.tools/inps						★★☆☆☆
mCSM	https://biosig.lab.uq.edu.au/mcsm/	24281696	NA					NA	★★☆☆☆
PopMusic	http://dezyme.com/	21569468	https://bio.tools/popmusic						★★☆☆☆
STRUM	http://zhanglab.ccmb.med.umich.edu/STRUM	27318206	NA					NA	★★☆☆☆
Genotype/Phenotype association methods
Name	URL	PMID	bio.tools	Citations	Download	Web Server	Update	Mature	Stars
AMELIE	https://amelie.stanford.edu/	32434849	https://bio.tools/AMELIE						★★☆☆☆
Exomizer	https://www.sanger.ac.uk/tool/exomiser/	26562621	https://bio.tools/exomiser						★★★★☆
GPAP	https://platform.rd-connect.eu/	35178824	https://bio.tools/rd-connect_platform						★★★☆☆
LIRICAL	https://lirical.readthedocs.io/en/latest/	32755546	https://bio.tools/lirical						★★☆☆☆
Legend
Citations: More than 50 citations
Download: Downloadable code or container
Web Server: Available web interface
Update: Publication or updated version in 2020 or later
Mature: According to the bio.tools tag
